# Supplementary material for: Three-dimensional networked NiCo2O4/MnO2branched nanowire heterostructure arrays on nickel foam with enhanced supercapacitor performance
Source: Royal Society of Chemistry journal article supplement (doi:10.1039/c4ta05059b), 2014-11-24
Supplement: c4ta05059b1.pdf [file c4ta05059b1.pdf]

## Three-Dimensional Networked NiCo<sub>2</sub>O<sub>4</sub>/MnO<sub>2</sub> Branched Nanowires Heterostructure Arrays on Nickel Foam with Enhanced Supercapacitor Performance

Rujia Zou,<sup>a,b</sup> Muk Fung Yuen,<sup>a</sup> Zhenyu Zhang,<sup>a</sup> Junqing Hu,<sup>b</sup> Wenjun Zhang<sup>a,\*</sup>

<sup>a</sup>Center of Super-Diamond and Advanced Films (COSDAF), Department of Physics and  
Materials Science, City University of Hong Kong, Hong Kong

E-mail: [apwjzh@cityu.edu.hk](mailto:apwjzh@cityu.edu.hk)

<sup>b</sup>State Key Laboratory for Modification of Chemical Fibers and Polymer Materials, College of  
Materials Science and Engineering, Donghua University, Shanghai 201620, China

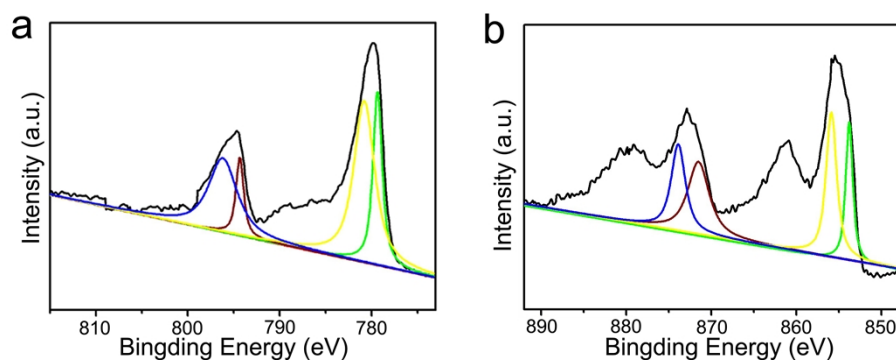

**Fig. S1** (a) Co 2p XPS spectrum and (b) Ni 2p XPS spectrum.

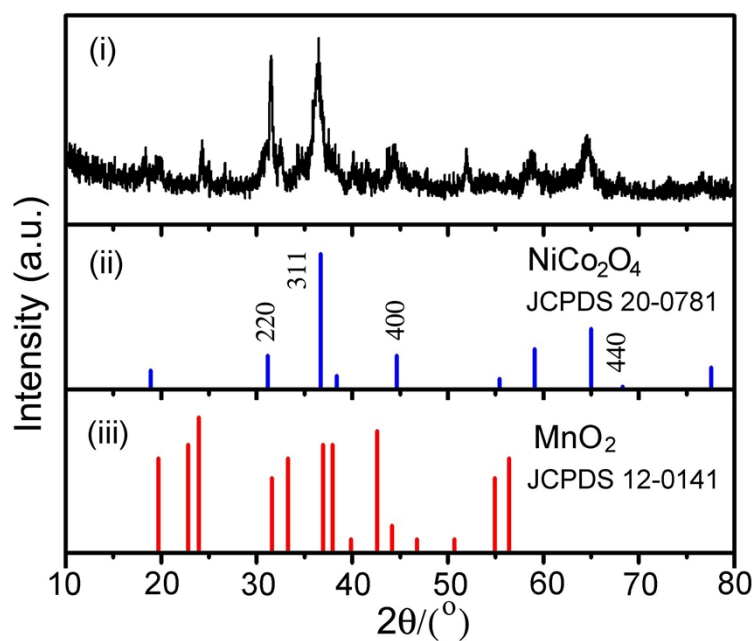

**Fig. S2** XRD patterns of the as-synthesized networked NiCo<sub>2</sub>O<sub>4</sub>/MnO<sub>2</sub> BNH after calcination (i), the NiCo<sub>2</sub>O<sub>4</sub> powders (ii) and MnO<sub>2</sub> powders (iii) from JCPDS card (NiCo<sub>2</sub>O<sub>4</sub>: No. 20-0781 and No. 12-0141), respectively.

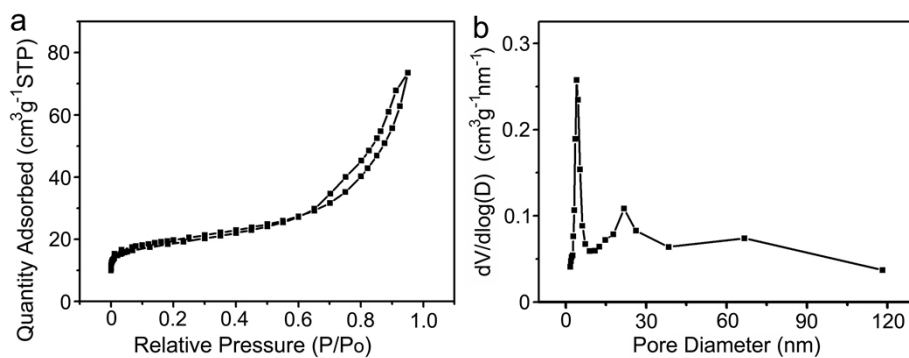

**Fig. S3** (a) Nitrogen adsorption-desorption isotherms of NiCo<sub>2</sub>O<sub>4</sub>/MnO<sub>2</sub> scratched from Ni substrate. (b) The pore size distribution curve obtained from the desorption data.

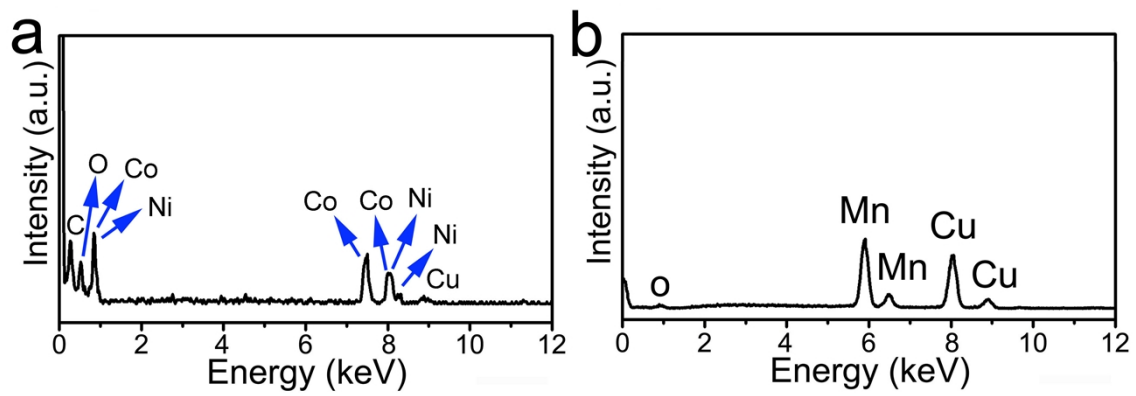

**Fig. S4** Typical EDX spectrum taken from a selected area of the  $\text{NiCo}_2\text{O}_4$  core nanowire and  $\text{MnO}_2$  branched nanowires.

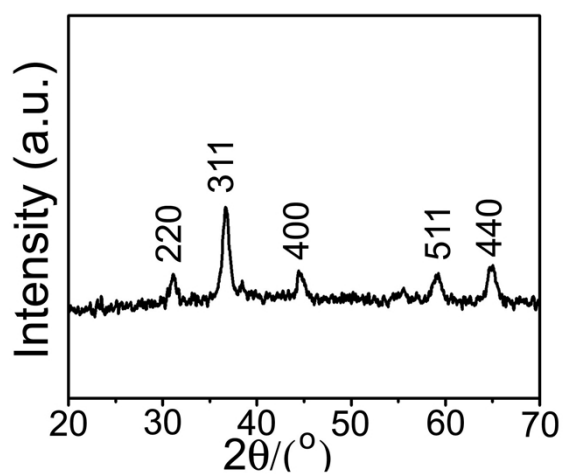

**Fig. S5** XRD patterns of the networked  $\text{NiCo}_2\text{O}_4/\text{MnO}_2$  BNH arrays after 1 h of growth on Ni foam after post annealing process.

**Table S1.** A comparison of different growth techniques for branched nanowires.

| Methods                                 | Typical materials                                                                                                               | Advantages                                       | Disadvantages                              | References |
|-----------------------------------------|---------------------------------------------------------------------------------------------------------------------------------|--------------------------------------------------|--------------------------------------------|------------|
| Solution growth on pre-formed nanowires | ZnO/CuO, SnO <sub>2</sub> /ZnO, Si/ZnO <sub>2</sub> ,<br>SnO <sub>2</sub> /Fe <sub>2</sub> O <sub>3</sub> , Si/TiO <sub>2</sub> | High yield, large-scale,<br>low cost             | Multiple steps, poor<br>assembly           | 1-3        |
| Sequential catalyst assisted growth     | In <sub>2</sub> O <sub>3</sub> /SnO <sub>2</sub>                                                                                | High crystalline<br>quantity, good control       | Metal catalyst needed,<br>high temperature | 4,5        |
| One-step self-catalysed growth          | ZnO/In <sub>2</sub> O <sub>3</sub>                                                                                              | Metal catalyst-free, high<br>crystalline quality | High temperature CVD                       | 6,7        |
| One-step hydrothermal reaction          | NiCo <sub>2</sub> O <sub>4</sub> /MnO <sub>2</sub>                                                                              | Simplicity, large-scale,<br>low cost, uniformity | Low crystalline quality                    | This work  |

1 C. W. Cheng, B. Liu, H. Y. Yang, W. W. Zhou, L. Sun, R. Chen, S. F. Yu, J. X. Zhang, H. Gong, H. D. Sun and H. J. Fan, *ACS Nano*, 2009, **3**, 3069.

2 W. Zhou, C. Cheng, J. P. Liu, Y. Y. Tay, J. Jiang, X. T. Jia, J. X. Zhang, H. Gong, H. H. Hng, T. Yu and H. J. Fan, *Adv. Funct. Mater.*, 2011, **21**, 2439.

3 A. Kargar, Y. Jing, S. J. Kim, C. T. Riley, X. Q. Pan and D. L. Wang, *ACS Nano*, 2013, **7**, 11112.

4 D. Wang, F. Qian, C. Yang, Z. H. Zhong and C. M. Lieber, *Nano Lett.*, 2004, **4**, 871.

5 C. Yan, X. Li, K. Zhou, A. Pan, P. Werner, S. L. Mensah, A. T. Vogel and V. Schmidt, *Nano Lett.*, 2012, **12**, 1799.

6 J. Y. Lao, J. G. Wen and Z. F. Ren, *Nano Lett.*, 2002, **2**, 1287.

7 F. Sauvage, F. Di Fonzo, A. L. Bassi, C. S. Casari, V. Russo, G. Divitini, C. Ducati, C. E. Bottani, P. Comte and M. Graetzel, *Nano Lett.*, 2010, **10**, 2562.

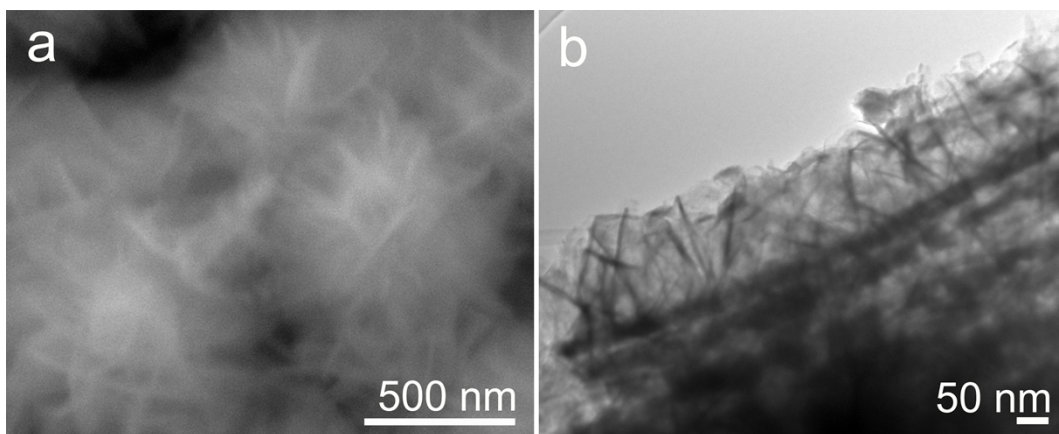

**Fig. S6** SEM and TEM images of the NiCo<sub>2</sub>O<sub>4</sub>/MnO<sub>2</sub> CSH arrays.

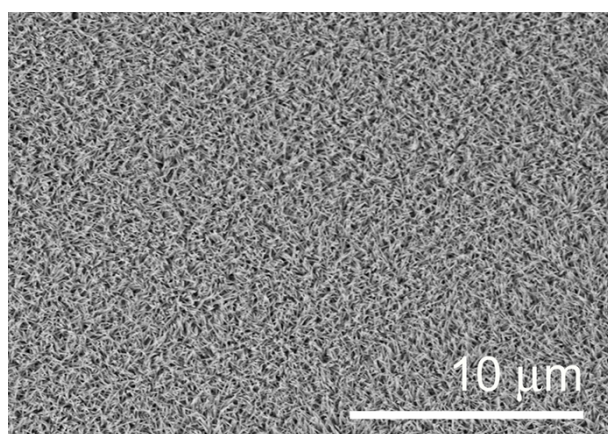

**Fig. S7** SEM image of the NiCo<sub>2</sub>O<sub>4</sub> nanowires arrays.

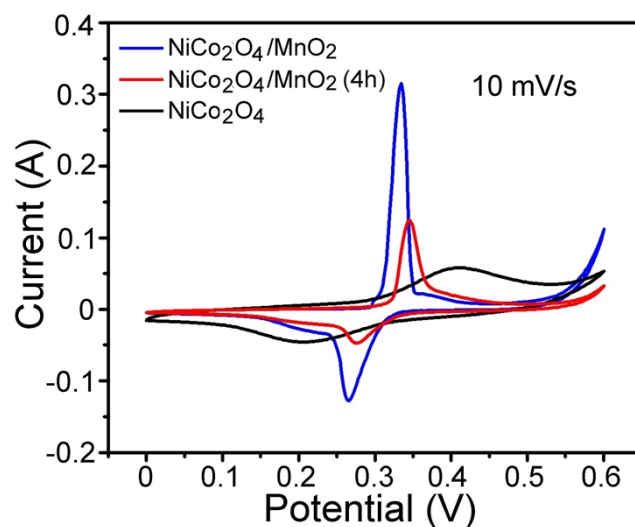

**Fig. S8** Comparison of the networked  $\text{NiCo}_2\text{O}_4/\text{MnO}_2$  BNH electrode, networked  $\text{NiCo}_2\text{O}_4/\text{MnO}_2$  BNH electrode after 4 h of growth on Ni foam and  $\text{NiCo}_2\text{O}_4$  nanowires electrode at the same scan rate of  $10 \text{ mV s}^{-1}$ .

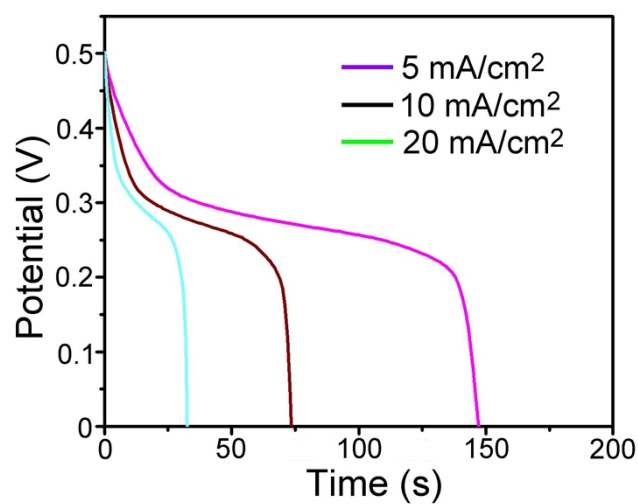

**Fig. S9** Discharge curves at different scan rates recorded from electrodes consisting of networked  $\text{NiCo}_2\text{O}_4/\text{MnO}_2$  BNH electrode.

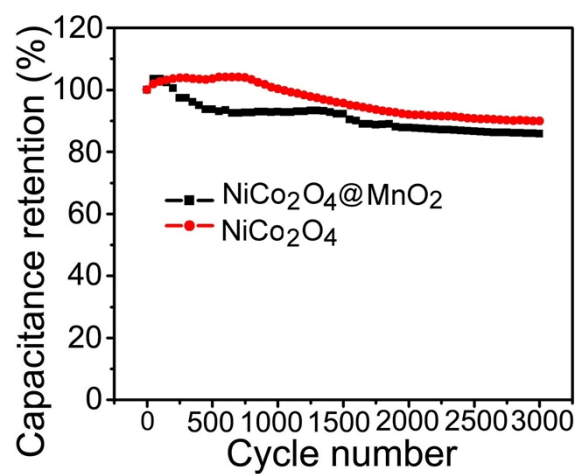

**Fig. S10** Cycling performances of NiCo<sub>2</sub>O<sub>4</sub> nanowires arrays and NiCo<sub>2</sub>O<sub>4</sub>@MnO<sub>2</sub> CSH electrodes during 3000 cycles at constant current densities of 10 mA cm<sup>-2</sup>.

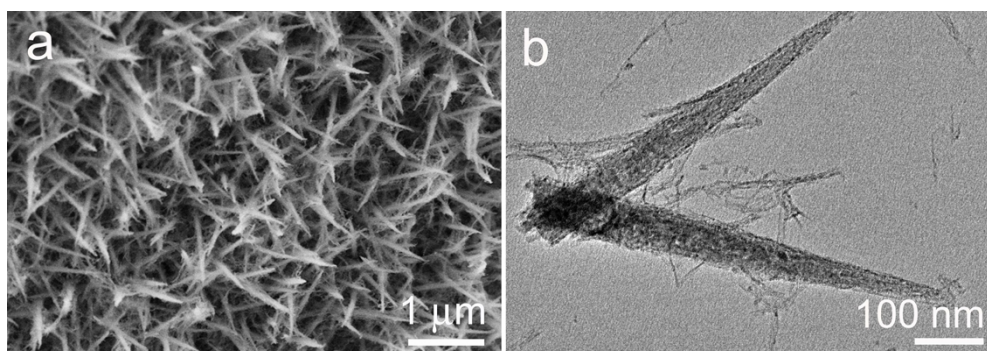

**Fig. S11** (a) SEM and (b) TEM images of the NiCo<sub>2</sub>O<sub>4</sub>/MnO<sub>2</sub> after 3000 cycles at constant current densities of 10 mA cm<sup>-2</sup>.
